# Supplementary material for: Loss of Individual Mitochondrial Ribonuclease P Complex Proteins Differentially Affects Mitochondrial tRNA Processing In Vivo
Source: MDPI journal article supplement (doi:10.3390/ijms22116066), 2021-06-04
Supplement: s1 [file s1]

# Figure S1

A

Scu WT:        1 **M I K N A V S L V T G G A S G L G R A T**        20  
                 1 ATGATCAAGAACGCCGTTTCCCTGGTGACCGGAGGAGCCTCTGGACTGGGCCGCGCCACC 60

Scu<sup>K07</sup>:        1 **M I K N A V S L V** **S R R S L W T G P R H...**54aa..**\***  
                 1 ATGATCAAGAACGCCGTTTCCCTGGT**CTC**CCGGAGGAGCCTCTGGACTGGGCCGCGCCAC

Scu<sup>K011</sup>:        1 **M I K N A V S L V T**        **E P L D W A A P P...**10aa..**\***  
                 1 ATGATCAAGAACGCCGTTTCCCTGGTGAC**---**GGAGCCTCTGGACTGGGCCGCGCCACC

B

Rswl WT:        421 R Q R R E G L E F Q L D T W A T G K Q K K K Q R Q N \*  
                 1261 AGGCAGCGACGGGAGGGCTTGGAGTTCCA**ACT**TGGACACTTGGGCAACGGGGAAGCAAAAGAAAAAGCAGAGACAAAATTAA

Rswl<sup>2-3</sup>:        421 R Q R R E G L E F Q L D        **N G E A K E K A E T K L K...**23aa..**\***  
                 1261 AGGCAGCGACGGGAGGGCTTGGAGTTCCA**ACTGGA****-----**CAACGGGGAAGCAAAAGAAAAAGCAGAGACAAAATTAA

Rswl<sup>11-10</sup>:        421 R Q R R E G L E F Q L D        **G E A K E K A E T K L K...**23aa..**\***  
                 1261 AGGCAGCGACGGGAGGGCTTGGAGTTCCA**ACTGG****-----**ACGGGGAAGCAAAAGAAAAAGCAGAGACAAAATTAA

Figure S2

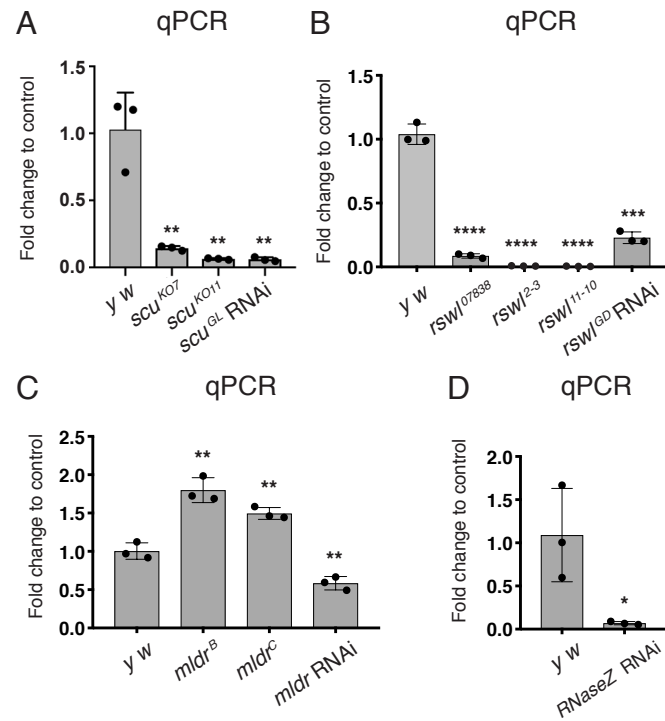

Figure S3

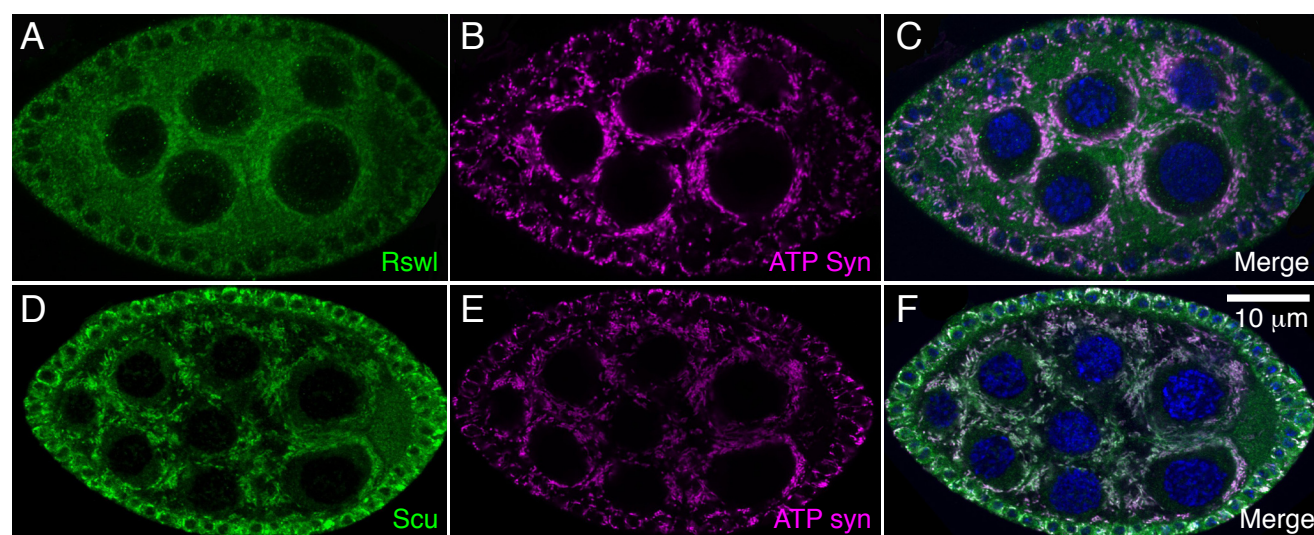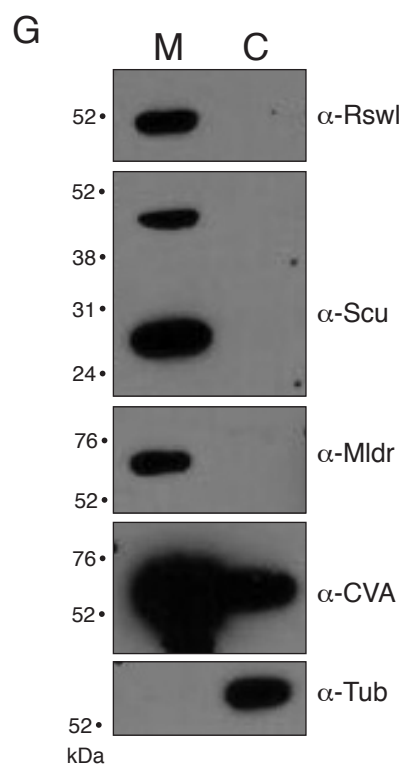

Figure S4

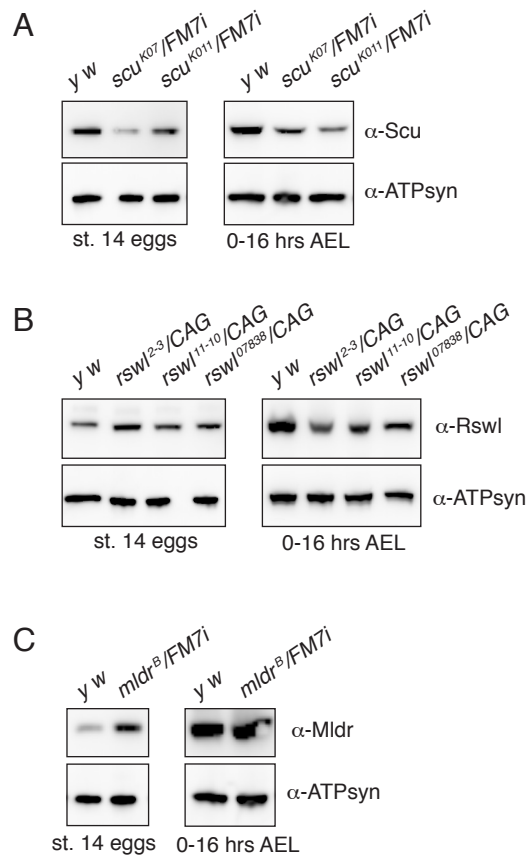

Figure S5

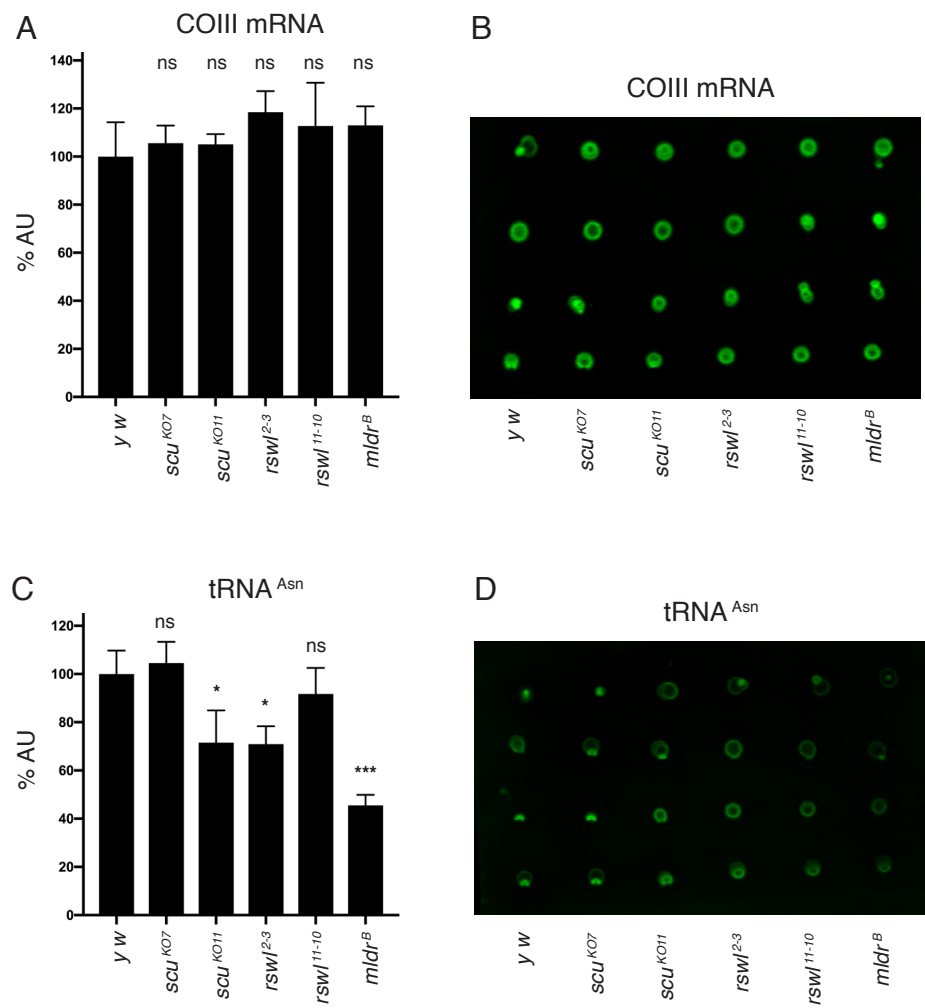

Table S1

| Name                      | Sequence                             |
|---------------------------|--------------------------------------|
| nc RNA - 5' tRNA Met F    | TGGTGTATGATGCACAAAAGTTT              |
| nc RNA - 5' tRNA Met R    | AACCTTTATAAATGGGGTATGAACC            |
| COIII - 5' tRNA Gly F     | TCACAATTTACTGATGAGGAGGA              |
| COIII - 5' tRNA Gly R     | AATAGACCTTATGATTGGAAGTCAA            |
| 3' tRNA Arg - 5' tRNA Asn | GAAGCGATTGATTGCAATTAGTTTC            |
| 3' tRNA Arg - 5' tRNA Asn | CAATTATATCATTAACAGTGATATGCCTC        |
| lr RNA - 5' tRNA Leu(CUN) | TCTAAATTTATTGCACTAATCTGCC            |
| lr RNA - 5' tRNA Leu(CUN) | GTACGAAAGGACCAAATATCAAAA             |
| ATP6 - 5' COIII F         | GAATCAGCTGTAGCTATAATTCAATC           |
| ATP6 - 5' COIII R         | GTTAATGGTCATGGACTATAATCCAC           |
| nc RNA - 5' COI F         | ATCTATCGCCTAAACTTCAGCC               |
| nc RNA - 5' COI R         | TTTGTAGAAAATAATCATTGTCGCG            |
| nc RNA - 5' ND6 F         | GAAAAGAAATTTCTTTTTCATTAATCCCC        |
| nc RNA - 5' ND6 R         | GCTAATGGATGAATTATTTAGAAAAATAATGG     |
| ND6 - 5' Cytb F           | ATTGTAAAAATTACAAAATTATTTAAAGGACC     |
| ND6 - 5' Cytb R           | CATTATTGGCAATTTTAAATAGAGGATGG        |
| nc RNA - 5' ND4L F        | CGATTAGAAACAAAACAAAATAGCCC           |
| nc RNA - 5' ND4L R        | TTTTGATTTACAAGACCAATGTT              |
| tRNA Ile 3' - nc RNA F    | AGTTTTCTGCATTCATTGACTGA              |
| tRNA Ile 3' - nc RNA R    | AACTTTTGTGCATCATACACCAA              |
| tRNA Leu(CUN) 3' - ND1    | CAAATAATTAATAACAACTACCAATTAATGAC     |
| tRNA Leu(CUN) 3' - ND1    | TTAGTGCAATAAATTTAGAATTTATATATGTG     |
| 18S F                     | TGGTCTTGTACCGACGACAG                 |
| 18S R                     | GCTGCCTTCCTTAGATGTGG                 |
| tRNA Asn_int F            | TAATTGAAGCCAAAAAGAGGCGATATC          |
| tRNA Asn_int R            | CTTAATTGGAATTTAAAATTCAATTATATCATTAAC |
| tRNA Met_int F            | AAAAAGATAAGCTAATTAAGCTACTGG          |
| tRNA Met_int R            | TAAAAAGAAAAGGATTATAACCTTTATAAATGG    |
| COIII_int F               | CTGTATATCAATGATGACGAGATGTATC         |
| COIII_int R               | CTCATCGTAAACCAATAGTTACTGC            |
| ND2_int F                 | GGACATTAATTACAGTTACATCTAATTC         |
| ND2_int R                 | CTAAACCTATTCAAGCTCCTAACC             |
